# Supplementary material
Source: PubMed Central journal article supplement (PMC5457707)

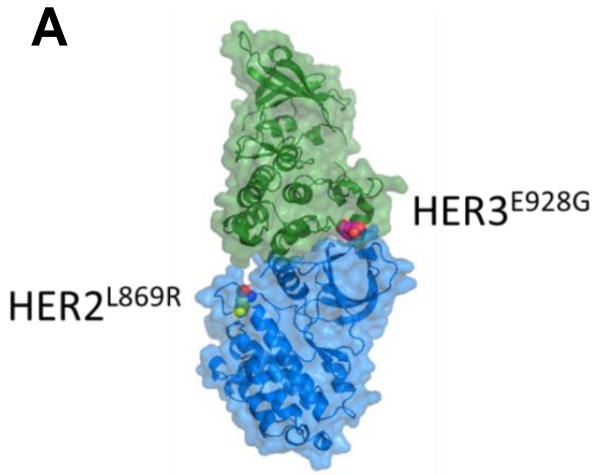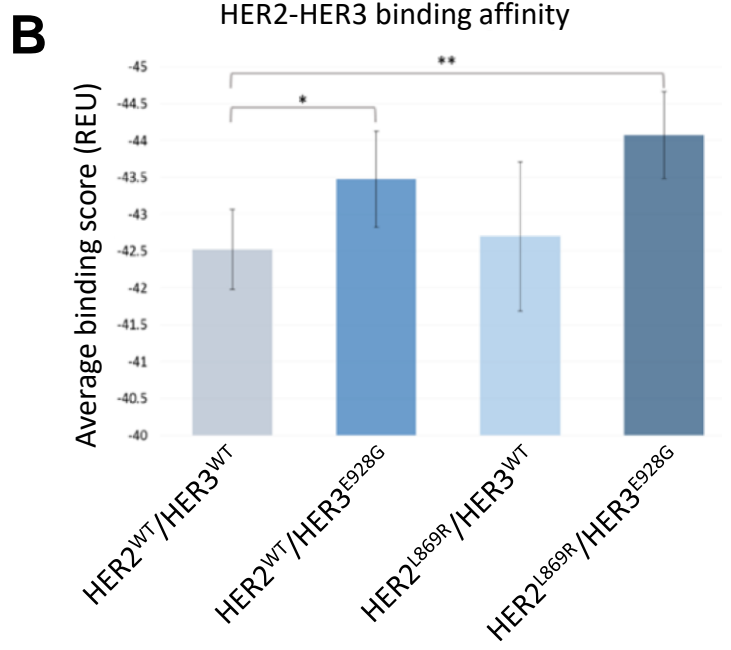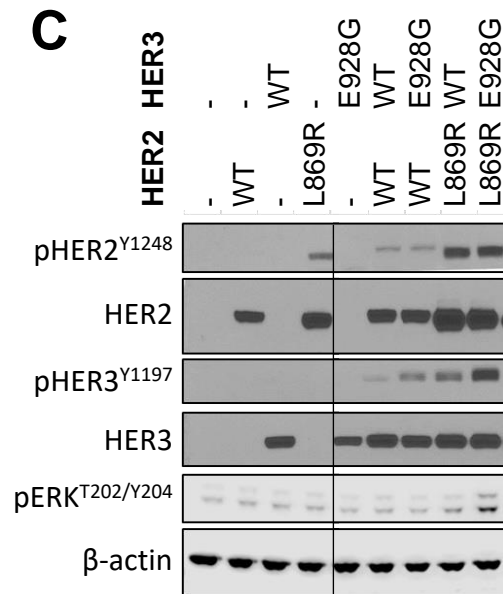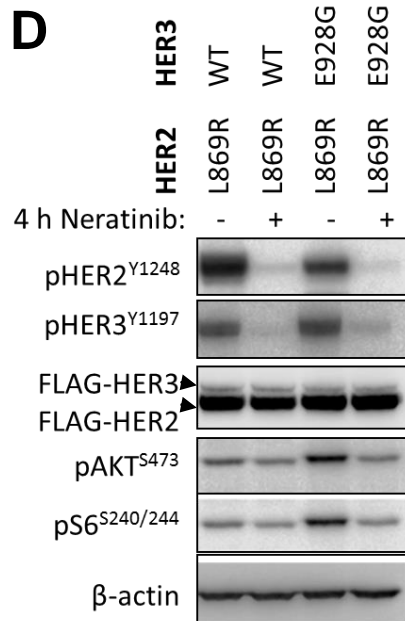

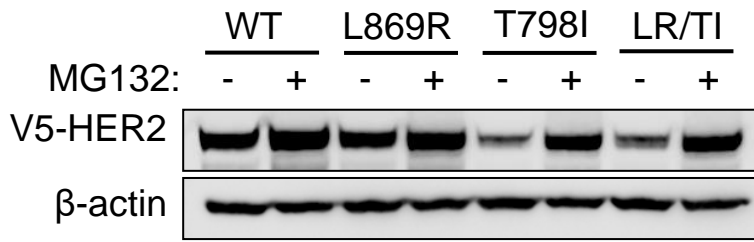

Supplement: NIHMS858762-supplement-2.pdf [file NIHMS858762-supplement-2.pdf]
